# Supplementary material
Source: PubMed Central journal article supplement (PMC5029223)
Supplement: ismej2015198x1.pdf [file ismej2015198x1.pdf]

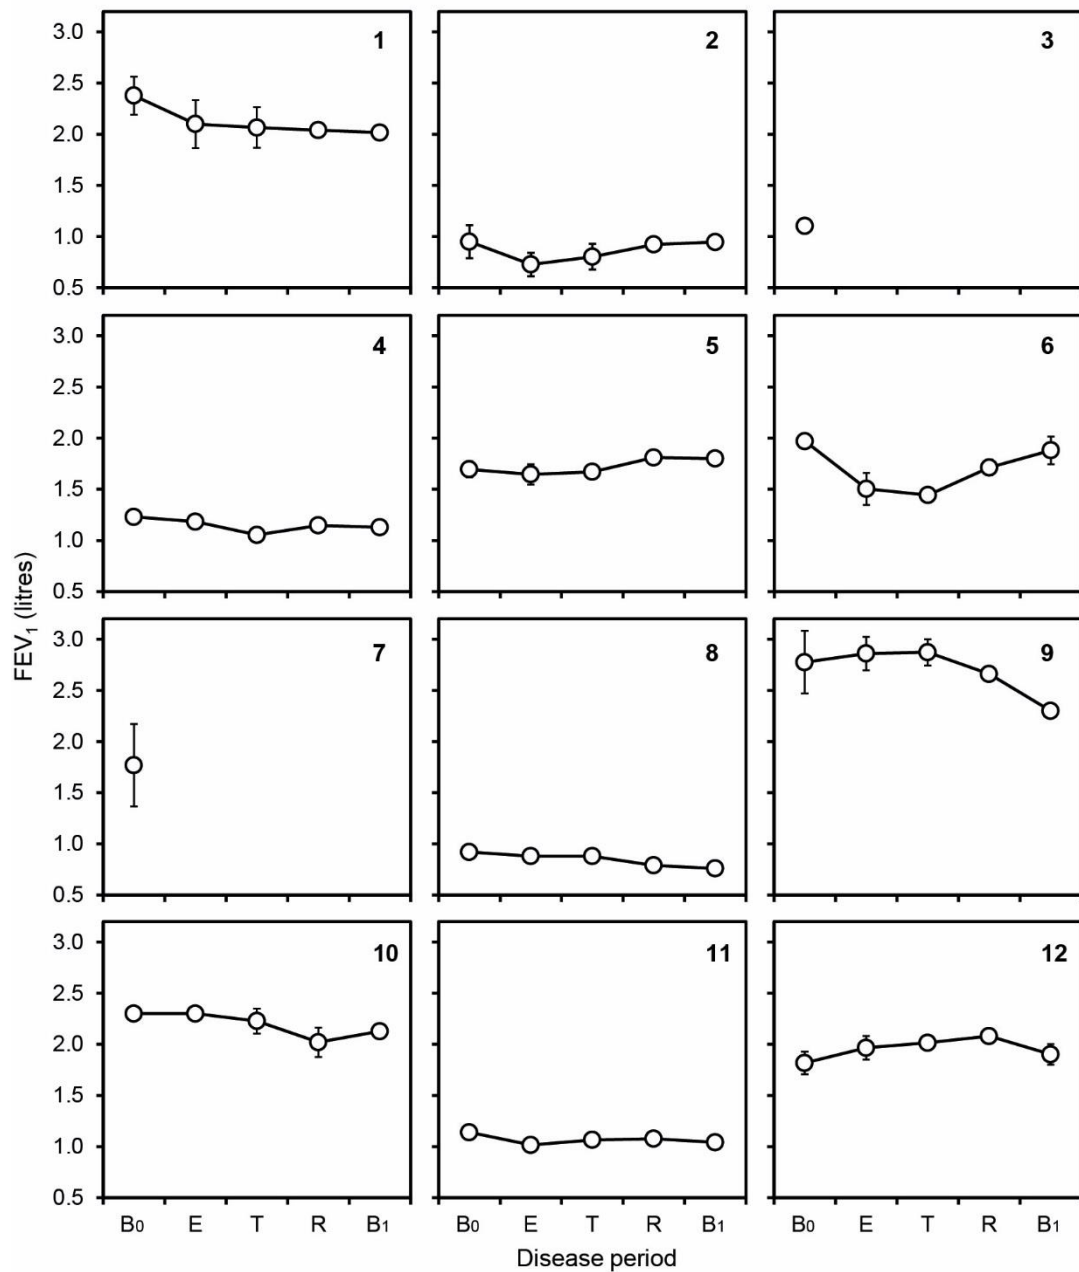

**Figure S1** Changes in lung function (FEV<sub>1</sub> in litres) through disease periods for each patient. (B<sub>0</sub>) Stable pre-cystic fibrosis pulmonary exacerbation (CFPE), (E) CFPE, 30 days prior to treatment, (T) CFPE treatment, (R) recovery, 30 days post-CFPE treatment, and (B<sub>1</sub>) stable post-CFPE. Patients 3 and 7 did not experience CFPE within the study, therefore only lung function data for disease period B<sub>0</sub> are given. In each instance, mean FEV<sub>1</sub> values are given per disease period. Error bars represent the standard deviation of the mean.
